# Supplementary material for: First-principles anharmonic quantum calculations for peptide spectroscopy: VSCF calculations and comparison with experiments
Source: Royal Society of Chemistry journal article supplement (doi:10.1039/c5cp05979h), 2015-12-01
Supplement: c5cp05979h1.pdf [file c5cp05979h1.pdf]

## Supporting Information

### First-Principles Anharmonic Quantum Calculations for Peptide Spectroscopy: VSCF Calculations and Comparison with Experiments

*Tapta Kanchan Roy,<sup>§±</sup> Rahul Sharma<sup>#</sup> and R. Benny Gerber<sup>\*§§</sup>*

<sup>§</sup>Institute of Chemistry, The Hebrew University of Jerusalem, 91904 (Israel)

<sup>#</sup>Department of Chemistry, Indian Institute of Technology, Roorkee, Uttarakhand 247667 (India)

<sup>§</sup>Department of Chemistry, University of California Irvine, CA 92697 (USA) and Department of Chemistry, University of Helsinki, PO Box 55, 00014 Helsinki (Finland)

<sup>±</sup>Department of Chemistry, Central University of Rajasthan, Rajasthan 305817, India

#### Contents:

|                                                                                                                |            |
|----------------------------------------------------------------------------------------------------------------|------------|
| <b>1. Pair-wise couplings and VSCF-PT2 approximation .....</b>                                                 | <b>S2</b>  |
| <b>2. Frequencies and intensities for NATA-C5 (Table S1).....</b>                                              | <b>S3</b>  |
| <b>3. Frequencies and intensities for NATA-C7 (Table S2).....</b>                                              | <b>S4</b>  |
| <b>4. Frequencies and intensities for AVPO (Table S3) .....</b>                                                | <b>S5</b>  |
| <b>5. Spectra of AVPO .....</b>                                                                                | <b>S6</b>  |
| <b>6. Comparisons of computed vibrational harmonic frequencies by HF and MP2 of C7 conformer of NATA .....</b> | <b>S7</b>  |
| <b>7. Comparisons of computed vibrational harmonic frequencies by HF and MP2 of C5 conformer of NATA .....</b> | <b>S8</b>  |
| <b>8. Comparisons of computed vibrational harmonic frequencies by HF and MP2 of AVPO .....</b>                 | <b>S9</b>  |
| <b>9. Computed vibrational frequencies of NATA-C7 by HF/MP2 potential .....</b>                                | <b>S10</b> |
| <b>10. Computed vibrational frequencies of NATA-C5 by HF/MP2 potential .....</b>                               | <b>S11</b> |
| <b>11. Computed vibrational frequencies of AVPO by HF/MP2 potential .....</b>                                  | <b>S13</b> |
| <b>12. Optimized coordinates for NATA-C5, NATA-C7 and AVPO .....</b>                                           | <b>S16</b> |

## Pair-wise coupling and VSCF-PT2 approximation

VSCF potential can be written as a sum of one-mode (diagonal approximation) and pair-wise coupling in terms of normal coordinate ( $Q$ ),

$$V(Q_1, \dots, Q_N) = \sum_{i=1}^N V_i^{diag}(Q_i) + \sum_j \sum_{i>j}^N V_{ij}^{2coup}(Q_i, Q_j) . \quad (1)$$

This type of potential needs multi-dimensional grid point calculations and the number of grid points increases rapidly with the dimensionality of the potential and the vibrational modes. If  $NG$  is the number of grid points along a normal mode and  $NV$  is the number of vibrational modes then the number of total grid points ( $NP$ ) is

$$NP = [NV \times NG] + \frac{[NV(NV - 1) \times NG^2]}{2} . \quad (2)$$

The PT2 correction on to of VSCF is described by the following equation:

$$E_n^{PT2} = E_n^{VSCF} + \sum_{m \neq n} \frac{\left| \left\langle \prod_{j=1}^N \psi_j^{(n)}(Q_j) \right| \Delta V \left| \prod_{j=1}^N \psi_j^{(m)}(Q_j) \right\rangle \right|^2}{E_n^{(0)} - E_m^{(0)}} , \quad (3)$$

where  $E_n^{PT2}$  is the correlation corrected energy of the state  $n$ .

**Table S1. Comparisons of frequencies and intensities of experimental and computed vibrational frequencies and intensities of C5 conformer of NATA (local minima). % error is calculated for VSCF-PT2 against experimental frequencies.**

| Mode description    | Exp. Freq. | Exp. intensity | HO (HF) | VSCF-PT2 | Intensity | % error     |
|---------------------|------------|----------------|---------|----------|-----------|-------------|
| NH <sub>2</sub> str | 3538       | 1.0            | 3942    | 3537     | 0.80      | 0.03        |
| Indole NH str       | 3523       | 0.85           | 3911    | 3568     | 1.0       | 1.28        |
| φ-amide NH str.     | 3430       | 0.80           | 3869    | 3424     | 0.83      | 0.17        |
| NH <sub>2</sub> str | 3417       | 0.53           | 3802    | 3428     | 0.50      | 0.32        |
| Pyrole CH str       | --         | --             | 3407    | 3127     | 0.02      | --          |
| Phenyl CH str.      | 3074       | 0.97           | 3367    | 3071     | 0.25      | 0.10        |
| Phenyl CH str.      | 3059       | 0.57           | 3356    | 3054     | 0.14      | 0.16        |
| Phenyl CH str.      | --         | --             | 3344    | 3050     | 0.13      | --          |
| Phenyl CH str.      | --         | --             | 3334    | 3041     | 0.01      | --          |
| Alkyl CH str.       | 3004       | 0.35           | 3293    | 3002     | 0.19      | 0.07        |
| Alkyl CH str.       | --         | --             | 3287    | 2993     | 0.08      | --          |
| Alkyl CH str.       | --         | --             | 3269    | 2902     | 0.12      | --          |
| Alkyl CH str.       | 2956       | 0.24           | 3255    | 2966     | 0.11      | 0.51        |
| Alkyl CH str.       |            | --             | 3202    | 2917     | 0.12      | --          |
| Alkyl CH str.       | 2933       | 0.43           | 3201    | 2889     | 0.24      | 1.5         |
| <b>Avg. % error</b> |            |                |         |          |           | <b>0.46</b> |

**Table S2: Comparisons frequencies and intensities of experimental and computed vibrational frequencies of C7 conformer of NATA (global minima). ). % error is calculated for VSCF-PT2 against experimental frequencies.**

| Mode description    | Exp. freq | Exp. Intensity | HO   | VSCF-PT2 | Intensity | % error     |
|---------------------|-----------|----------------|------|----------|-----------|-------------|
| NH <sub>2</sub> str | 3516      | 0.63           | 3921 | 3521     | 1.0       | 0.14        |
| Indole NH str.      | 3521      | 0.74           | 3911 | 3573     | 0.94      | 1.47        |
| φ-amide NH str.     | 3429      | 0.85           | 3861 | 3461     | 0.86      | 0.93        |
| NH <sub>2</sub> str | 3334      | 1.00           | 3773 | 3406     | 0.66      | 2.16        |
| Pyrole CH str       | --        | --             | 3441 | 3064     | 0.02      | --          |
| Phenyl CH str.      | 3092      | 0.18           | 3366 | 3076     | 0.23      | 0.52        |
| Phenyl CH str.      | 3072      | 0.36           | 3353 | 3082     | 0.35      | 0.33        |
| Phenyl CH str.      | 3048      | 0.18           | 3341 | 3067     | 0.05      | 0.62        |
| Phenyl CH str.      | --        | --             | 3332 | 3072     | 0.01      | -           |
| Alkyl CH str.       | 2999      | 0.19           | 3281 | 2975     | 0.12      | 0.80        |
| Alkyl CH str.       | 2979      | 0.14           | 3310 | 2961     | 0.11      | 0.60        |
| Alkyl CH str.       | --        |                | 3278 | 2949     | 0.11      | --          |
| Alkyl CH str.       | 2938      | 0.51           | 3211 | 2915     | 0.22      | 0.78        |
| Alkyl CH str.       | 2919      | 0.15           | 3237 | 2895     | 0.16      | 0.82        |
| Alkyl CH str.       | --        | --             | 3199 | 2962     | 0.05      | --          |
| <b>Avg. % error</b> |           |                |      |          |           | <b>0.83</b> |

**Table S3: Comparisons of experimental and computed vibrational frequencies of global minima of AVPO. % error is calculated for VSCF-PT2 against experimental frequencies.**

| Mode description      | Experiments | HO   | PES except | % error     |
|-----------------------|-------------|------|------------|-------------|
| Phe NH str.           | 3451        | 3866 | 3423       | 0.81        |
| Val NH str.           | 3441        | 3842 | 3411       | 0.87        |
| Phenyl CH str.        | 3096        | 3370 | 3064       | 1.03        |
| Phenyl CH str.        | 3076        | 3350 | 3048       | 0.91        |
| Phenyl CH str.        | 3038        | 3359 | 3071       | 1.09        |
| Phenyl CH str.        | 3006        | 3331 | 3040       | 1.13        |
| Methyl CH str. of Val | 2974        | 3256 | 2997       | 0.77        |
| Methyl CH str. of Val | 2965        | 3268 | 2974       | 0.30        |
| Methyl CH str. of Val | 2941        | 3259 | 2942       | 0.03        |
| Phenyl CO str.        | 1765        | 1998 | 1789       | 1.36        |
| Acetyl CO str.        | 1711        | 1950 | 1753       | 2.00        |
| Val CO str.           | 1696        | 1913 | 1730       | 2.45        |
| <b>Avg. % error</b>   |             |      |            | <b>1.06</b> |

**Fig. S1. Spectra of AVPO (Black: experiment; Magenta: VSCF-PT2)**

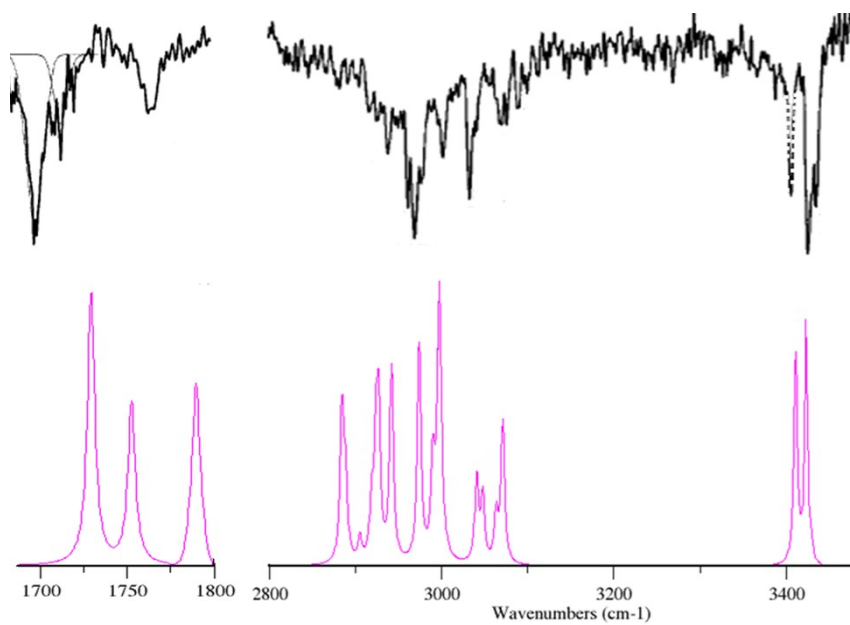

**Table S4: Comparisons of computed vibrational harmonic frequencies by HF and MP2 of C7 conformer of NATA (using cc-pVDZ basis)**

|    | MP2 (Harmonic) | HF (Harmonic) |
|----|----------------|---------------|
| 1  | 3720           | 3921          |
| 2  | 3619           | 3911          |
| 3  | 3610           | 3861          |
| 4  | 3520           | 3773          |
| 5  | 3309           | 3441          |
| 6  | 3239           | 3366          |
| 7  | 3226           | 3353          |
| 8  | 3214           | 3341          |
| 9  | 3212           | 3310          |
| 10 | 3207           | 3332          |
| 11 | 3196           | 3278          |
| 12 | 3174           | 3281          |
| 13 | 3101           | 3199          |
| 14 | 3095           | 3237          |
| 15 | 3084           | 3211          |

**Table S5: Comparisons of computed vibrational harmonic frequencies by HF and MP2 of C5 conformer of NATA (using cc-pVDZ basis)**

|    | <b>MP2 (Harmonic)</b> | <b>HF (Harmonic)</b> |
|----|-----------------------|----------------------|
| 1  | 3726                  | 3942                 |
| 2  | 3680                  | 3911                 |
| 3  | 3612                  | 3868                 |
| 4  | 3573                  | 3802                 |
| 5  | 3278                  | 3407                 |
| 6  | 3239                  | 3367                 |
| 7  | 3227                  | 3355                 |
| 8  | 3215                  | 3344                 |
| 9  | 3209                  | 3334                 |
| 10 | 3217                  | 3392                 |
| 11 | 3194                  | 3287                 |
| 12 | 3099                  | 3269                 |
| 13 | 3149                  | 3255                 |
| 14 | 3096                  | 3202                 |
| 15 | 3080                  | 3201                 |



**Table S6: Comparisons of computed vibrational harmonic frequencies by HF and MP2 of AVPO (using cc-pVDZ basis)**

| <b>S. No.</b> | <b>MP2 (Harmonic)</b> | <b>HF (Harmonic)</b> |
|---------------|-----------------------|----------------------|
| 1             | 3609                  | 3866                 |
| 2             | 3590                  | 3842                 |
| 3             | 3246                  | 3370                 |
| 4             | 3243                  | 3350                 |
| 5             | 3234                  | 3337                 |
| 6             | 3222                  | 3332                 |
| 7             | 3221                  | 3359                 |
| 8             | 3212                  | 3317                 |
| 9             | 3206                  | 3340                 |
| 10            | 3201                  | 3318                 |
| 11            | 3189                  | 3268                 |
| 12            | 3181                  | 3268                 |
| 13            | 3181                  | 3278                 |
| 14            | 3179                  | 3226                 |
| 15            | 3177                  | 3262                 |
| 16            | 3172                  | 3259                 |
| 17            | 3118                  | 3256                 |
| 18            | 3110                  | 3249                 |
| 19            | 3107                  | 3245                 |
| 20            | 3104                  | 3224                 |
| 21            | 3093                  | 3194                 |
| 22            | 3078                  | 3186                 |
| 23            | 3076                  | 3179                 |
| 24            | 3071                  | 3172                 |
| 25            | 1819                  | 1998                 |
| 26            | 1781                  | 1950                 |
| 27            | 1763                  | 1913                 |

**RESULTS OF VIBRATIONAL SCF CALCULATION: (FREQUENCIES IN CM-1) for  
NATA-C7 ( using HF/MP2 potential with cc-pVDZ basis )**

| HARMONIC | DIAGONAL | VSCF    | PT2-VSCF |
|----------|----------|---------|----------|
| 3920.57  | 3743.99  | 3533.98 | 3520.89  |
| 3910.98  | 3535.65  | 3562.47 | 3572.71  |
| 3861.17  | 3469.52  | 3452.83 | 3460.62  |
| 3772.64  | 3436.06  | 3426.71 | 3406.27  |
| 3440.59  | 3177.92  | 3157.81 | 3163.96  |
| 3366.02  | 3173.31  | 3109.76 | 3075.98  |
| 3353.46  | 3220.59  | 3094.68 | 3082.20  |
| 3341.02  | 3181.23  | 3078.51 | 3066.89  |
| 3332.14  | 3202.53  | 3081.40 | 3071.71  |
| 3310.27  | 3191.36  | 2988.99 | 2961.47  |
| 3280.62  | 3099.21  | 2986.22 | 2974.79  |
| 3277.59  | 3206.86  | 2988.11 | 2949.42  |
| 3236.96  | 2977.76  | 2909.16 | 2895.06  |
| 3211.36  | 3029.53  | 2939.89 | 2914.51  |
| 3198.93  | 3023.92  | 3003.48 | 2961.66  |
| 1943.15  | 1781.79  | 1775.32 | 1774.47  |
| 1908.03  | 1741.98  | 1738.23 | 1737.97  |
| 1813.63  | 1672.86  | 1654.08 | 1652.39  |
| 1767.98  | 1615.68  | 1598.02 | 1596.43  |
| 1763.40  | 1612.35  | 1581.31 | 1576.91  |
| 1729.27  | 1599.30  | 1580.90 | 1578.60  |
| 1695.21  | 1559.84  | 1527.24 | 1523.22  |
| 1645.08  | 1516.74  | 1499.62 | 1498.34  |
| 1605.10  | 1462.11  | 1445.77 | 1444.31  |
| 1587.36  | 1474.33  | 1510.58 | 1509.76  |
| 1584.90  | 1456.19  | 1440.69 | 1439.19  |
| 1573.28  | 1448.94  | 1434.91 | 1432.95  |
| 1567.10  | 1458.44  | 1502.50 | 1502.39  |
| 1545.73  | 1416.40  | 1390.47 | 1387.35  |
| 1517.18  | 1392.35  | 1414.62 | 1413.09  |
| 1497.32  | 1380.82  | 1403.46 | 1404.89  |
| 1477.68  | 1356.03  | 1340.56 | 1339.40  |
| 1453.64  | 1342.45  | 1325.94 | 1324.07  |
| 1415.25  | 1320.83  | 1305.85 | 1304.23  |
| 1398.21  | 1292.16  | 1274.03 | 1271.97  |
| 1385.93  | 1364.86  | 1351.91 | 1349.65  |
| 1379.79  | 1259.81  | 1251.04 | 1248.71  |
| 1371.93  | 1265.64  | 1256.25 | 1254.97  |
| 1332.35  | 1250.86  | 1237.87 | 1236.46  |
| 1327.72  | 1227.25  | 1256.08 | 1258.04  |
| 1229.52  | 1144.93  | 1132.11 | 1130.87  |
| 1228.87  | 1159.55  | 1194.57 | 1196.36  |
| 1226.43  | 1141.45  | 1132.58 | 1128.08  |
| 1217.06  | 1194.66  | 1190.41 | 1188.98  |
| 1183.89  | 1104.13  | 1097.21 | 1095.81  |
| 1171.85  | 1092.38  | 1127.89 | 1129.75  |
| 1150.83  | 1051.18  | 1088.85 | 1087.36  |
| 1106.29  | 1026.22  | 1047.09 | 1045.29  |
| 1104.84  | 1026.69  | 1022.74 | 1020.86  |
| 1083.90  | 969.22   | 964.24  | 960.29   |
| 1080.57  | 994.51   | 1010.28 | 1008.95  |
| 1071.75  | 995.54   | 988.29  | 986.44   |
| 1049.02  | 909.26   | 905.69  | 901.72   |
| 1028.34  | 953.23   | 952.62  | 950.49   |
| 981.66   | 832.33   | 817.24  | 811.30   |

|        |        |         |         |
|--------|--------|---------|---------|
| 948.08 | 834.29 | 833.33  | 829.64  |
| 946.36 | 881.41 | 879.36  | 878.33  |
| 908.26 | 842.17 | 844.69  | 842.80  |
| 855.17 | 838.70 | 838.48  | 837.68  |
| 830.14 | 755.44 | 756.61  | 751.22  |
| 819.22 | 761.29 | 759.92  | 758.45  |
| 802.24 | 749.55 | 752.51  | 750.28  |
| 784.53 | 734.73 | 739.76  | 738.62  |
| 740.84 | 690.82 | 691.74  | 690.99  |
| 697.08 | 650.85 | 695.85  | 693.36  |
| 684.33 | 702.58 | 725.19  | 711.79  |
| 679.03 | 636.79 | 663.97  | 655.72  |
| 640.67 | 580.99 | 598.95  | 596.88  |
| 631.74 | 542.20 | 548.79  | 548.08  |
| 602.65 | 555.03 | 560.26  | 559.71  |
| 596.52 | 547.19 | 564.02  | 562.96  |
| 564.57 | 523.71 | 536.87  | 533.33  |
| 533.78 | 648.90 | 658.74  | 633.58  |
| 499.10 | 459.38 | 462.29  | 461.22  |
| 484.45 | 513.84 | 541.92  | 523.05  |
| 472.66 | 413.53 | 427.02  | 425.38  |
| 441.91 | 462.47 | 481.97  | 467.26  |
| 418.47 | 536.39 | 538.19  | 525.84  |
| 374.82 | 388.94 | 378.72  | 371.10  |
| 372.03 | 353.81 | 385.12  | 382.83  |
| 324.61 | 322.02 | 319.96  | 316.48  |
| 308.91 | 289.63 | 305.00  | 304.33  |
| 243.62 | 224.55 | 249.04  | 247.15  |
| 218.65 | 208.63 | 232.88  | 232.27  |
| 167.36 | 151.77 | 160.86  | 160.64  |
| 162.17 | 157.89 | 176.68  | 175.82  |
| 124.76 | 129.03 | 133.77  | 132.41  |
| 97.11  | 107.96 | 90.69   | 88.93   |
| 88.49  | 103.75 | 73.54   | 65.18   |
| 58.77  | 82.09  | 125.67  | 116.55  |
| 54.78  | 91.19  | 100.24  | 98.35   |
| 45.27  | 51.25  | -122.60 | -135.58 |
| 30.69  | 38.61  | 40.09   | 39.53   |

-----

**RESULTS OF VIBRATIONAL SCF CALCULATION: (FREQUENCIES IN CM-1) for NATA-C5 (using HF/MP2 potential with cc-pVDZ basis)**

| HARMONIC | DIAGONAL | VSCF    | PT2-VSCF |
|----------|----------|---------|----------|
| 3941.78  | 3762.10  | 3550.71 | 3536.74  |
| 3911.47  | 3536.68  | 3551.43 | 3568.11  |
| 3868.48  | 3473.78  | 3420.39 | 3423.97  |
| 3802.40  | 3488.06  | 3454.97 | 3428.24  |
| 3407.14  | 3143.73  | 3120.24 | 3126.79  |
| 3366.98  | 3172.93  | 3104.73 | 3070.74  |
| 3355.25  | 3225.88  | 3078.46 | 3054.10  |
| 3344.40  | 3203.50  | 3073.71 | 3050.35  |
| 3333.51  | 3211.81  | 3058.73 | 3040.73  |
| 3292.39  | 3223.41  | 3030.38 | 3002.27  |
| 3286.91  | 3194.13  | 3021.18 | 2993.44  |
| 3269.23  | 3031.36  | 2922.98 | 2901.97  |
| 3255.35  | 3141.34  | 2990.60 | 2966.30  |
| 3201.60  | 3029.28  | 2965.05 | 2916.87  |

|         |         |         |         |
|---------|---------|---------|---------|
| 3200.79 | 2990.60 | 2911.54 | 2888.88 |
| 1949.17 | 1786.90 | 1780.52 | 1778.43 |
| 1913.98 | 1752.20 | 1740.75 | 1739.02 |
| 1815.06 | 1672.38 | 1653.64 | 1652.20 |
| 1775.68 | 1617.84 | 1600.36 | 1598.79 |
| 1763.28 | 1615.18 | 1584.45 | 1579.66 |
| 1742.40 | 1597.43 | 1579.93 | 1577.92 |
| 1689.66 | 1543.30 | 1515.99 | 1511.86 |
| 1646.34 | 1515.74 | 1497.43 | 1495.97 |
| 1608.32 | 1466.28 | 1450.61 | 1449.18 |
| 1589.48 | 1474.18 | 1480.03 | 1478.71 |
| 1586.52 | 1456.38 | 1450.10 | 1448.73 |
| 1570.89 | 1458.02 | 1474.07 | 1472.94 |
| 1566.41 | 1448.28 | 1428.59 | 1425.50 |
| 1551.45 | 1429.18 | 1421.08 | 1419.24 |
| 1509.97 | 1382.72 | 1374.65 | 1372.15 |
| 1502.43 | 1372.30 | 1352.00 | 1349.26 |
| 1482.19 | 1373.61 | 1358.74 | 1357.51 |
| 1441.72 | 1336.63 | 1320.53 | 1318.60 |
| 1414.20 | 1388.11 | 1375.56 | 1373.79 |
| 1408.17 | 1296.71 | 1282.84 | 1281.31 |
| 1383.98 | 1363.24 | 1349.74 | 1347.26 |
| 1363.06 | 1338.22 | 1332.17 | 1330.27 |
| 1354.99 | 1230.26 | 1225.08 | 1223.07 |
| 1334.76 | 1226.99 | 1214.09 | 1212.63 |
| 1280.16 | 1179.05 | 1165.86 | 1163.72 |
| 1258.83 | 1190.23 | 1182.94 | 1180.32 |
| 1229.76 | 1142.71 | 1134.39 | 1132.81 |
| 1222.58 | 1156.83 | 1150.79 | 1148.80 |
| 1206.16 | 1123.98 | 1121.73 | 1117.30 |
| 1177.14 | 1104.79 | 1095.67 | 1093.65 |
| 1161.89 | 1076.41 | 1071.22 | 1069.85 |
| 1150.40 | 1048.96 | 1052.78 | 1050.26 |
| 1125.10 | 1050.54 | 1036.44 | 1034.31 |
| 1114.37 | 1019.01 | 1022.35 | 1020.68 |
| 1105.75 | 979.64  | 972.80  | 968.62  |
| 1103.94 | 1029.32 | 1027.02 | 1025.00 |
| 1081.88 | 993.38  | 1011.28 | 1008.27 |
| 1068.30 | 933.04  | 923.20  | 918.02  |
| 1038.27 | 957.91  | 952.97  | 951.31  |
| 959.02  | 869.07  | 862.28  | 856.46  |
| 948.72  | 881.13  | 874.85  | 874.12  |
| 938.98  | 795.12  | 785.42  | 780.41  |
| 874.32  | 814.38  | 819.13  | 816.76  |
| 856.62  | 839.21  | 839.02  | 838.35  |
| 837.36  | 822.16  | 831.92  | 830.27  |
| 837.08  | 842.03  | 842.86  | 834.05  |
| 820.35  | 803.90  | 802.90  | 802.20  |
| 809.31  | 793.37  | 795.95  | 794.72  |
| 710.31  | 696.74  | 704.78  | 703.39  |
| 702.39  | 694.60  | 718.15  | 713.23  |
| 687.64  | 628.20  | 637.53  | 636.43  |
| 677.80  | 609.83  | 620.30  | 619.60  |
| 635.04  | 580.27  | 588.43  | 588.09  |
| 630.67  | 548.29  | 550.20  | 549.83  |
| 603.14  | 662.08  | 667.99  | 642.72  |
| 582.92  | 539.15  | 554.66  | 552.57  |
| 535.90  | 497.22  | 522.30  | 521.05  |
| 521.12  | 687.52  | 678.20  | 653.72  |
| 502.16  | 459.78  | 470.24  | 469.43  |

|        |        |        |        |
|--------|--------|--------|--------|
| 479.00 | 420.86 | 424.53 | 423.41 |
| 444.97 | 439.13 | 451.03 | 444.56 |
| 388.28 | 541.99 | 549.23 | 534.80 |
| 373.99 | 399.93 | 425.97 | 412.74 |
| 349.30 | 384.83 | 390.35 | 376.18 |
| 335.82 | 342.20 | 340.13 | 334.14 |
| 313.47 | 382.64 | 388.34 | 373.11 |
| 276.44 | 266.32 | 289.43 | 286.19 |
| 251.06 | 232.33 | 247.75 | 247.03 |
| 235.51 | 233.43 | 248.33 | 244.54 |
| 163.15 | 162.96 | 184.48 | 183.33 |
| 157.76 | 143.52 | 160.32 | 159.86 |
| 103.75 | 121.55 | 154.75 | 149.23 |
| 78.68  | 91.76  | 102.39 | 99.97  |
| 69.37  | 85.54  | 141.42 | 141.28 |
| 62.09  | 66.05  | 83.59  | 82.22  |
| 41.56  | 55.58  | 69.31  | 69.70  |
| 25.17  | 25.17  | 25.17  | 25.17  |
| 20.59  | 19.07  | 6.36   | 2.26   |

---

**RESULTS OF VIBRATIONAL SCF CALCULATION: (FREQUENCIES IN CM-1) for AVPO (using HF/MP2 potential with cc-pVDZ basis)**

| HARMONIC | DIAGONAL | VSCF    | PT2-VSCF |
|----------|----------|---------|----------|
| 3865.84  | 3471.22  | 3423.25 | 3422.50  |
| 3841.81  | 3451.85  | 3406.30 | 3411.46  |
| 3369.50  | 3183.88  | 3111.07 | 3063.64  |
| 3358.79  | 3226.21  | 3095.30 | 3071.16  |
| 3350.27  | 3210.64  | 3073.91 | 3047.91  |
| 3339.78  | 3199.41  | 3072.00 | 3057.68  |
| 3337.17  | 3199.35  | 3065.14 | 3041.17  |
| 3331.90  | 3196.97  | 3062.34 | 3039.73  |
| 3318.43  | 3157.53  | 3022.82 | 3000.77  |
| 3317.13  | 3230.71  | 3013.23 | 2990.34  |
| 3277.75  | 3202.99  | 3018.51 | 2997.62  |
| 3268.32  | 3176.20  | 3008.19 | 2974.07  |
| 3267.62  | 3200.37  | 2966.83 | 2941.13  |
| 3262.20  | 3029.88  | 2933.26 | 2921.84  |
| 3259.06  | 3184.02  | 2975.38 | 2942.06  |
| 3255.69  | 3151.16  | 3031.39 | 2997.36  |
| 3249.38  | 3155.53  | 3016.26 | 2988.13  |
| 3244.58  | 3015.37  | 2937.85 | 2918.87  |
| 3225.60  | 3060.32  | 2982.59 | 2942.11  |
| 3223.88  | 3035.56  | 2972.75 | 2927.04  |
| 3193.96  | 3019.15  | 2957.18 | 2905.20  |
| 3186.00  | 3027.37  | 2945.25 | 2888.69  |
| 3178.71  | 3055.77  | 2950.48 | 2924.08  |
| 3171.50  | 2986.07  | 2900.26 | 2884.33  |
| 1998.19  | 1800.40  | 1790.17 | 1789.47  |
| 1949.79  | 1765.65  | 1754.63 | 1752.92  |
| 1912.57  | 1745.67  | 1731.28 | 1729.62  |
| 1803.93  | 1648.22  | 1628.54 | 1626.23  |
| 1775.30  | 1627.68  | 1605.30 | 1603.60  |
| 1710.25  | 1555.66  | 1528.97 | 1526.16  |
| 1680.52  | 1527.10  | 1499.72 | 1496.38  |
| 1650.12  | 1515.41  | 1497.30 | 1496.21  |
| 1609.86  | 1495.81  | 1491.07 | 1490.47  |

|         |         |         |         |
|---------|---------|---------|---------|
| 1604.94 | 1491.71 | 1480.69 | 1479.07 |
| 1601.33 | 1486.58 | 1481.01 | 1480.53 |
| 1598.72 | 1567.22 | 1559.54 | 1558.51 |
| 1597.74 | 1475.11 | 1464.68 | 1463.72 |
| 1593.74 | 1480.00 | 1474.59 | 1474.30 |
| 1592.35 | 1561.67 | 1549.89 | 1548.32 |
| 1589.88 | 1477.74 | 1472.53 | 1471.27 |
| 1583.06 | 1474.21 | 1484.48 | 1482.75 |
| 1581.00 | 1466.53 | 1466.42 | 1466.20 |
| 1565.81 | 1454.18 | 1464.02 | 1461.97 |
| 1539.94 | 1410.78 | 1404.95 | 1403.50 |
| 1529.84 | 1399.85 | 1391.55 | 1390.31 |
| 1523.81 | 1395.83 | 1387.84 | 1386.24 |
| 1513.97 | 1384.62 | 1364.53 | 1362.89 |
| 1499.97 | 1363.17 | 1345.56 | 1343.75 |
| 1489.76 | 1367.08 | 1353.24 | 1351.83 |
| 1478.84 | 1350.30 | 1446.23 | 1447.03 |
| 1461.68 | 1335.70 | 1324.26 | 1323.20 |
| 1457.23 | 1332.17 | 1318.93 | 1317.93 |
| 1424.46 | 1305.47 | 1290.70 | 1289.20 |
| 1418.67 | 1263.36 | 1245.56 | 1243.33 |
| 1382.86 | 1271.39 | 1258.43 | 1256.10 |
| 1371.52 | 1346.16 | 1335.52 | 1333.84 |
| 1359.63 | 1334.61 | 1325.91 | 1324.63 |
| 1335.90 | 1312.07 | 1301.38 | 1299.46 |
| 1316.18 | 1293.25 | 1287.69 | 1285.74 |
| 1312.69 | 1287.03 | 1280.02 | 1278.84 |
| 1307.18 | 1282.49 | 1386.86 | 1387.77 |
| 1301.63 | 1276.54 | 1272.94 | 1272.08 |
| 1282.90 | 1193.34 | 1184.75 | 1182.95 |
| 1278.84 | 1254.08 | 1248.12 | 1247.12 |
| 1273.20 | 1186.69 | 1177.03 | 1172.76 |
| 1237.63 | 1151.32 | 1142.73 | 1141.58 |
| 1219.01 | 1133.44 | 1126.18 | 1125.33 |
| 1204.01 | 1184.48 | 1176.89 | 1175.17 |
| 1173.17 | 1097.50 | 1090.36 | 1088.44 |
| 1168.51 | 1078.80 | 1083.86 | 1082.56 |
| 1148.04 | 1046.75 | 1050.44 | 1047.49 |
| 1131.39 | 1048.92 | 1155.37 | 1155.83 |
| 1122.79 | 1042.96 | 1035.97 | 1034.39 |
| 1108.93 | 1096.97 | 1096.96 | 1092.80 |
| 1107.87 | 1033.45 | 1028.11 | 1026.44 |
| 1091.39 | 1083.21 | 1083.91 | 1078.90 |
| 1083.41 | 1001.67 | 993.54  | 992.22  |
| 1079.71 | 1011.77 | 1027.69 | 1024.39 |
| 1072.24 | 992.87  | 987.02  | 985.37  |
| 1048.16 | 1027.70 | 1027.52 | 1026.17 |
| 1040.06 | 1020.82 | 1029.78 | 1028.73 |
| 1036.97 | 1021.79 | 1027.04 | 1024.67 |
| 1024.14 | 921.22  | 926.94  | 924.49  |
| 1006.36 | 944.06  | 953.65  | 952.48  |
| 994.32  | 928.67  | 945.43  | 942.82  |
| 962.18  | 888.41  | 889.90  | 888.28  |
| 946.40  | 878.12  | 876.93  | 871.19  |
| 915.49  | 858.75  | 857.28  | 856.38  |
| 901.95  | 828.57  | 830.16  | 829.05  |
| 855.58  | 798.02  | 799.31  | 798.61  |
| 830.42  | 772.54  | 774.61  | 773.81  |
| 823.53  | 746.71  | 754.05  | 751.45  |
| 774.98  | 764.78  | 773.68  | 770.89  |

|        |        |        |        |
|--------|--------|--------|--------|
| 767.50 | 708.64 | 715.08 | 714.09 |
| 697.19 | 643.88 | 651.24 | 650.09 |
| 692.74 | 680.25 | 689.43 | 686.83 |
| 676.66 | 630.37 | 654.20 | 651.49 |
| 676.54 | 617.60 | 615.34 | 615.16 |
| 660.15 | 594.97 | 603.08 | 602.56 |
| 633.19 | 593.34 | 620.78 | 616.39 |
| 596.44 | 721.15 | 721.65 | 691.43 |
| 562.90 | 513.95 | 534.90 | 531.84 |
| 531.60 | 494.71 | 499.85 | 499.06 |
| 518.59 | 666.36 | 663.92 | 648.08 |
| 490.59 | 465.10 | 579.97 | 575.84 |
| 459.84 | 414.97 | 431.49 | 430.71 |
| 454.55 | 412.31 | 418.26 | 417.35 |
| 432.57 | 400.90 | 426.29 | 423.92 |
| 408.21 | 403.41 | 414.42 | 409.55 |
| 387.54 | 361.91 | 375.88 | 375.47 |
| 376.20 | 351.68 | 367.35 | 366.42 |
| 333.83 | 311.71 | 327.38 | 327.14 |
| 307.00 | 273.08 | 280.89 | 280.70 |
| 286.30 | 274.90 | 292.07 | 291.60 |
| 277.17 | 285.19 | 314.47 | 308.02 |
| 260.68 | 304.09 | 315.53 | 304.26 |
| 236.03 | 234.30 | 269.54 | 268.12 |
| 234.63 | 325.72 | 328.53 | 315.87 |
| 202.99 | 205.09 | 221.69 | 219.62 |
| 181.79 | 181.42 | 203.38 | 202.22 |
| 167.88 | 236.82 | 242.43 | 239.19 |
| 164.86 | 199.81 | 228.86 | 224.55 |
| 143.15 | 183.74 | 193.04 | 189.63 |
| 121.00 | 114.37 | 137.37 | 136.29 |
| 90.79  | 114.38 | 135.02 | 133.46 |
| 81.34  | 90.06  | 112.79 | 112.12 |
| 67.35  | 90.52  | 97.58  | 96.57  |
| 65.67  | 82.95  | 95.64  | 95.22  |
| 63.24  | 94.75  | 107.71 | 107.61 |
| 55.89  | 86.56  | 302.47 | 301.74 |
| 53.01  | 73.96  | 175.40 | 172.81 |
| 43.30  | 66.43  | 75.24  | 73.71  |
| 27.34  | 40.18  | 47.18  | 47.78  |
| 19.74  | 26.95  | 37.47  | 38.35  |
| 14.26  | 19.72  | 22.07  | 22.08  |

---

---

**Optimized coordinates of NATA-C5 at MP2/cc-pVDZ**

---

---

|   |     |               |               |               |
|---|-----|---------------|---------------|---------------|
| N | 7.0 | 2.0944038867  | -2.2504652013 | 3.6105076247  |
| C | 6.0 | 2.5134311507  | -0.9949902008 | 4.0078138436  |
| C | 6.0 | 2.0360174903  | -0.0622560009 | 3.0338134415  |
| C | 6.0 | 1.3119281064  | -0.8136073440 | 2.0369663171  |
| C | 6.0 | 1.3714860608  | -2.1472324565 | 2.4364928397  |
| C | 6.0 | 3.2626637376  | -0.5901811374 | 5.1307670890  |
| C | 6.0 | 3.5217433408  | 0.7776977592  | 5.2666142721  |
| C | 6.0 | 3.0461903739  | 1.7195208342  | 4.3138004294  |
| C | 6.0 | 2.3046005695  | 1.3206984297  | 3.1983299148  |
| C | 6.0 | 0.6386478012  | -0.2297576254 | 0.8308445564  |
| C | 6.0 | 1.6354392429  | 0.3977652576  | -0.1832312793 |
| N | 7.0 | 0.9597086888  | 1.2913972485  | -1.0957683970 |
| C | 6.0 | 0.6626571412  | 2.5699481661  | -0.7172241618 |
| C | 6.0 | 0.1204022423  | 3.4579901837  | -1.8238837066 |
| C | 6.0 | 2.3290793858  | -0.6725286288 | -1.0313581696 |
| N | 7.0 | 3.2142719278  | -1.4515881362 | -0.3422787065 |
| O | 8.0 | 2.1112455517  | -0.7909685992 | -2.2365661194 |
| O | 8.0 | 0.8300247200  | 2.9729186581  | 0.4367523206  |
| H | 1.0 | 3.6241740276  | -1.3121519004 | 5.8714620343  |
| H | 1.0 | 4.0996040023  | 1.1294567036  | 6.1278901866  |
| H | 1.0 | 3.2639322299  | 2.7823849392  | 4.4627882324  |
| H | 1.0 | 1.9268968298  | 2.0494084834  | 2.4711815300  |
| H | 1.0 | 0.9379273609  | -3.0319882731 | 1.9670700155  |
| H | 1.0 | 2.2543457047  | -3.1104316642 | 4.1222314634  |
| H | 1.0 | 0.0197144806  | -0.9834998930 | 0.3111213179  |
| H | 1.0 | -0.0278504484 | 0.5894140767  | 1.1501689537  |
| H | 1.0 | 2.3936741168  | 0.9620249599  | 0.3897830120  |
| H | 1.0 | 3.5470694585  | -2.2837976817 | -0.8203839033 |
| H | 1.0 | 0.9633288124  | 1.0019385763  | -2.0721225681 |
| H | 1.0 | -0.6473120613 | 4.1215883133  | -1.4005794503 |
| H | 1.0 | 0.9382139972  | 4.0895721193  | -2.2087687038 |
| H | 1.0 | -0.3051946965 | 2.8801580557  | -2.6586574637 |
| H | 1.0 | 3.1471947674  | -1.4789350217 | 0.6717302348  |



---

---

**Optimized coordinates at NATA-C7 at MP2/cc-pVDZ**

---

---

|   |     |               |               |               |
|---|-----|---------------|---------------|---------------|
| C | 6.0 | -1.6885016730 | -0.1662461258 | 0.4609377502  |
| C | 6.0 | -2.6010527744 | -0.7247055354 | -0.4940284842 |
| C | 6.0 | -3.7470009596 | -0.0333646634 | -0.9358179566 |
| C | 6.0 | -3.9736677867 | 1.2420543542  | -0.4084643953 |
| C | 6.0 | -3.0836946295 | 1.8172942615  | 0.5389971943  |
| C | 6.0 | -1.9491131210 | 1.1295297741  | 0.9793591140  |
| C | 6.0 | -0.6416568579 | -1.1359599058 | 0.6737590785  |
| C | 6.0 | -0.9439079889 | -2.2190092989 | -0.1464439450 |
| H | 1.0 | -4.4352637821 | -0.4745554070 | -1.6653929516 |
| H | 1.0 | -4.8539044115 | 1.8075654765  | -0.7316968082 |
| H | 1.0 | -3.2965848756 | 2.8169915122  | 0.9326552850  |
| H | 1.0 | -1.2719849161 | 1.5831016033  | 1.7124035894  |
| H | 1.0 | -0.3815698230 | -3.1399986223 | -0.2940188042 |
| H | 1.0 | -2.5467402312 | -2.6043350727 | -1.4943360653 |
| N | 7.0 | -2.1169047822 | -1.9691779402 | -0.8317262352 |
| C | 6.0 | 0.5571351559  | -0.9754539734 | 1.5680953347  |
| H | 1.0 | 0.2946971996  | -0.3246634768 | 2.4200422691  |
| H | 1.0 | 0.8709993948  | -1.9509053155 | 1.9695872350  |
| C | 6.0 | 1.7572096040  | -0.3569382019 | 0.8340693712  |
| H | 1.0 | 2.5233332394  | -0.0274957648 | 1.5614251119  |
| C | 6.0 | 2.4420452905  | -1.3957861926 | -0.0827155390 |
| O | 8.0 | 2.0932019083  | -2.5747991883 | -0.1284973386 |
| N | 7.0 | 3.4681532158  | -0.8736689554 | -0.8096333363 |
| H | 1.0 | 4.0401465020  | -1.5227721395 | -1.3389088018 |
| H | 1.0 | 3.8176103677  | 0.0569449859  | -0.5793205163 |
| N | 7.0 | 1.3261359967  | 0.8376415562  | 0.1184489740  |
| H | 1.0 | 0.3702030348  | 0.8461169522  | -0.2308054973 |
| C | 6.0 | 2.1582170683  | 1.8768640631  | -0.1664433133 |
| O | 8.0 | 3.3654036124  | 1.8605421601  | 0.1081103017  |
| C | 6.0 | 1.4998127266  | 3.0569643152  | -0.8574086864 |
| H | 1.0 | 1.8563239346  | 3.9816339499  | -0.3795056842 |
| H | 1.0 | 1.8244858046  | 3.0795240282  | -1.9106366217 |
| H | 1.0 | 0.4003355567  | 3.0184047872  | -0.8167276283 |

---

---

**Optimized coordinates of AVPO at MP2/cc-pVDZ**

---

---

|   |     |               |               |               |
|---|-----|---------------|---------------|---------------|
| C | 6.0 | 1.4074560215  | -1.4677471893 | -1.0084177288 |
| C | 6.0 | 1.7870512199  | -0.1464511168 | -1.7415692846 |
| H | 1.0 | 2.7480019524  | -0.3079507824 | -2.2575071858 |
| H | 1.0 | 1.0110256366  | 0.0406448853  | -2.4996821193 |
| C | 6.0 | 1.8675181474  | 1.0002496084  | -0.7634099487 |
| C | 6.0 | 0.7145211076  | 1.7549065239  | -0.4568146268 |
| C | 6.0 | 3.0606663688  | 1.2777904011  | -0.0639073379 |
| H | 1.0 | -0.2114459794 | 1.5662445718  | -1.0123847031 |
| C | 6.0 | 0.7392498044  | 2.7443716120  | 0.5407069217  |
| C | 6.0 | 3.0982207770  | 2.2798788625  | 0.9205550135  |
| H | 1.0 | 3.9684040632  | 0.7096489877  | -0.3021944429 |
| H | 1.0 | -0.1797866216 | 3.2882854476  | 0.7821689330  |
| C | 6.0 | 1.9351342889  | 3.0064098922  | 1.2321532290  |
| H | 1.0 | 4.0340514514  | 2.4890777422  | 1.4500806324  |
| H | 1.0 | 1.9616625425  | 3.7771032389  | 2.0097475628  |
| H | 1.0 | 1.2508232041  | -2.2564667038 | -1.7647276923 |
| C | 6.0 | 2.5347867536  | -1.8927239910 | -0.0793335846 |
| O | 8.0 | 2.4555207604  | -1.9382883767 | 1.1341797154  |
| O | 8.0 | 3.6491864644  | -2.1804702387 | -0.7823178647 |
| C | 6.0 | 4.7738124498  | -2.5469173077 | 0.0407805751  |
| H | 1.0 | 5.5970527848  | -2.7390513763 | -0.6581444897 |
| H | 1.0 | 5.0293255199  | -1.7271515702 | 0.7292950079  |
| H | 1.0 | 4.5444928802  | -3.4481361941 | 0.6288489100  |
| N | 7.0 | 0.2251403268  | -1.3225835466 | -0.1805073196 |
| H | 1.0 | 0.4175536817  | -1.1368850781 | 0.8026706886  |
| C | 6.0 | -0.9548015256 | -0.8902976534 | -0.7061020556 |
| O | 8.0 | -1.1966176196 | -0.8893018826 | -1.9175658496 |
| C | 6.0 | -1.9765948333 | -0.4158299649 | 0.3296044475  |
| H | 1.0 | -1.4663162686 | 0.2068644867  | 1.0857103464  |
| C | 6.0 | -2.6615997519 | -1.6027031602 | 1.0444282258  |
| H | 1.0 | -1.8527160994 | -2.1947089189 | 1.5163762880  |
| C | 6.0 | -3.5963380718 | -1.0822051119 | 2.1397887075  |
| H | 1.0 | -4.0439546511 | -1.9208980939 | 2.6995416342  |
| H | 1.0 | -3.0606743692 | -0.4304918744 | 2.8497613209  |
| H | 1.0 | -4.4131824304 | -0.4918590224 | 1.6912966539  |
| C | 6.0 | -3.4109374617 | -2.4969151754 | 0.0520668954  |
| H | 1.0 | -4.2114402233 | -1.9219131595 | -0.4451974125 |
| H | 1.0 | -2.7436344433 | -2.8993577908 | -0.7282555311 |
| H | 1.0 | -3.8809452449 | -3.3464238951 | 0.5757826475  |
| N | 7.0 | -2.9257364615 | 0.4467885665  | -0.3525518460 |
| H | 1.0 | -3.0259277869 | 0.2370027521  | -1.3459775954 |
| C | 6.0 | -3.0557590669 | 1.7664543292  | 0.0305638529  |
| O | 8.0 | -2.6250843641 | 2.1990138170  | 1.0985623921  |
| C | 6.0 | -3.7827647263 | 2.6387896065  | -0.9786568762 |
| H | 1.0 | -3.0435111906 | 3.0864161938  | -1.6647560674 |
| H | 1.0 | -4.5104317121 | 2.0650022122  | -1.5731731081 |
| H | 1.0 | -4.2926623040 | 3.4529244374  | -0.4450889308 |
